# Supplementary material for: Synergistic activation of RARβ and RARγ nuclear receptors restores cell specialization during stem cell differentiation by hijacking RARα-controlled programs
Source: Life Sci Alliance. 2022 Nov 29;6(2):e202201627. doi: 10.26508/lsa.202201627 (PMC9711859; doi:10.26508/lsa.202201627)
Supplement: Supplementary file 1 [file LSA-2022-01627_TableS1.xlsx]

## Sheet: gene_markers_perCellType
Neuron	Astrocyte	OPC	GABAergic	Glutamatergic	Dopaminergic
1110015O18Rik	Hgf	Lum	1810011O10Rik	2310002F09Rik	Zfp804a
1500009L16Rik	Gli1	Dcn	2610028E06Rik	2700069I18Rik	Zfp40
1500016L03Rik	Aqp4	Pdgfra	3110035E14Rik	2810404M03Rik	Zeb2
1600029O15Rik	Gli2	Col3a1	4930553C11Rik	3632454L22Rik	Zdhhc2
1700040L02Rik	Bmpr1b	Slc6a13	5033421B08Rik	4930555B11Rik	Zbtb7c
1810011O10Rik	Gli3	Fam19a4	9430021M05Rik	5031414D18Rik	Zar1
2010204K13Rik	Lgr6	Fam70b	A330070K13Rik	5930412G12Rik	Wscd1
2310002F09Rik	Plcd4	Slc22a6	A730009L09Rik	8030453O22Rik	Wnt7b
2410066E13Rik	Ppp1r3c	Pnlip	Ackr3	9330158H04Rik	Wnt5a
2410076I21Rik	Tnc	Fam180a	Acvr1c	9530026P05Rik	Wls
2410137F16Rik	Ccrl1	Pcdh15	Adamts19	A730090H04Rik	Whrn
2610018G03Rik	Pla2g3	Col1a1	Adora1	A830009L08Rik	Wfs1
2610028E06Rik	Slc30a10	Sulf1	Adra1d	Abracl	Wdr54
2610109H07Rik	Ptx3	Lhfpl3	Agtr2	Adamts2	Vwc2l
2700069I18Rik	A2m	Shc4	Ajap1	Adcyap1	Vip
2700090O03Rik	Itih3	C1ql2	Akr1c18	Adora2a	Vcan
2810025M15Rik	Gcnt4	C1ql1	Ano3	Adra1b	Vamp1
2810404M03Rik	Mamdc2	Prkg2	Aqp5	Adssl1	Uncx
2810468N07Rik	Slc14a1	Galnt3	Aqp6	Agmat	Unc5c
2900055J20Rik	Atp13a4	Gsx1	Arhgap36	Aldh1a3	Unc13b
3110035E14Rik	Slc14a2	Cspg4	Arhgap6	Aldh1l1	Ubash3b
3110047P20Rik	Grm3	Ppapdc1a	Ascl2	Aldh3b1	Tyw3
3632454L22Rik	P4ha3	A930003O13Rik	Atp6ap1l	ALM	Tubb6
4930539E08Rik	Paqr6	Chrna4	Barx2	Angpt1	Tspan9
4930553C11Rik	Fgfr3	Bglap	Bche	Arhgap25	Tspan18
4930555B11Rik	Egfr	Wnt10a	Bglap2	Art3	Tspan15
5031414D18Rik	Gdpd2	Slc22a3	Bhlhe22	Asb2	Tshz2
5033421B08Rik	Nwd1	Megf11	Bmp2	Aspg	Trpc6
5330417C22Rik	Slc4a4	Lad1	Bmp3	Avpr1a	Trh
5730522E02Rik	Itga7	Stk32a	Brinp3	Batf3	Tox2
5930412G12Rik	Aqp9	Dll3	C1ql1	Bcan	Tmem91
6330439K17Rik	Aldh1l1	Lingo3	C1ql3	Bcl11b	Tmem2
6430598A04Rik	St6galnac5	Acan	C1qtnf7	Bglap3	Tmem196
8030453O22Rik	Cbs	Col1a2	Cadps2	Bhlhe22	Tmem178
9030425E11Rik	Cybrd1	Lnx1	Calb1	Blnk	Tmem176a
9130024F11Rik	Fmo1	Apol11b	Calb2	Bmp3	Tmem163
9330158H04Rik	Phkg1	2010317E24Rik	Calcb	Brinp3	Tmem159
9430021M05Rik	Slc6a11	Adamtsl3	Calcrl	C030013G03Rik	Tmem132b
9430031J16Rik	Otx1	Nxph1	Car10	C1ql2	Tmem117
9530026P05Rik	Gm973	Gria3	Car4	Car1	Tm6sf1
A230073K19Rik	Ttll8	Kcnh8	Casq2	Car2	Tm4sf5
A330070K13Rik	Cth	Sstr1	Cbln4	Car3	Tlk1
A530058N18Rik	Chrdl1	Cdo1	Cckbr	Cbln2	Tle3
A730009L09Rik	Ccdc80	Chst5	Cd24a	Cbln4	Tle1
A730090H04Rik	Slc25a34	Aldh1a2	Cdca7	Cbr3	Tiam2
A830009L08Rik	Sorcs2	Abca6	Cdh7	Ccdc80	Th
A830018L16Rik	Cyp4f15	E130309F12Rik	Cdk15	Ccnd1	Tgfb2
A830082K12Rik	Entpd2	Slitrk1	Cela1	Cd24a	Tenm3
A930011O12Rik	Grhl1	Lrrtm3	Chat	Cd40	Tenm2
A930038C07Rik	5330437I02Rik	Dpyd	Chn2	Cd52	Tekt2
Abcc8	Kcnn3	Kcnk1	Chodl	Cd72	Tcf4
Ablim3	Ccdc37	Fam196b	Chrna2	Cdh10	Tcf12
Abracl	Dio2	Cntn4	Chrna3	Cdh13	Tacr3
Acbd4	Fzd10	Prelp	Chrna4	Cdh9	Syt17
Ache	Nat8	Itih2	Chrnb3	Cdhr1	Syt13
Ackr3	Sox9	Col13a1	Clrn1	Cenpa	Syt10
Actl6a	Fam181a	Smoc1	Cobll1	Chn2	Syndig1l
Actl6b	Celsr1	Rnf43	Col14a1	Chrm2	Syn2
Acvr1c	Slc15a2	Mmp15	Col15a1	Chrna5	Svep1
Adam11	Gm5089	S100a3	Col24a1	Chrna6	Sv2c
Adamts15	Slc7a2	Mc4r	Col25a1	Chrnb3	Sv2b
Adamts19	Aifm3	Cobl	Col6a1	Clic5	Surf6
Adamts2	Glis3	Bglap2	Colgalt2	Cntnap3	Sulf2
Adamtsl2	AI464131	Myt1	Crabp1	Col18a1	Stk19
Adap1	Vnn1	Snora34	Crh	Col23a1	Stac2
Adarb2	Klri1	Cacng4	Crhr2	Col24a1	Stac
Adck5	Myom3	C1ql3	Crispld2	Col27a1	St8sia5
Adcy1	Slc7a10	Mfap4	Cryaa	Col6a1	St6galnac4
Adcy8	Sctr	Rlbp1	Crygs	Col8a1	Sstr2
Adcyap1	Slc39a12	Fam5c	Csgalnact1	Coro6	Sstr1
Adora1	Mlc1	Serinc2	D030045P18Rik	Cpa6	Sst
Adora2a	Ppp1r3g	4833424O15Rik	Daam2	Cplx3	Spx
Adra1b	Pipox	Fbln7	Dab1	Cpne2	Spsb2
Adra1d	Frem2	Dmrta1	Dcn	Cpne7	Spr
Adra2c	Notch3	A430107P09Rik	Ddit4l	CR	Spon1
Adssl1	Pamr1	Emid2	Diap3	Crh	Sparcl1
Aff2	Ephx2	Matn4	Dock5	CT	Sp8
Agbl4	Slc1a3	Emid1	Drd2	Ctsz	Sox6
Agmat	Prdm16	Dcaf12l1	E030019B13Rik	Ctxn3	Sorcs2
Agtr2	Gm11627	3632451O06Rik	Ecel1	Cux2	Snhg4
AI593442	Trim9	Mrgprf	Edn1	Defb1	Sncg
AI606473	Fzd2	Olfm2	Edn3	Depdc7	Snca
AI836003	2900052N01Rik	Tmem179	Efemp1	Diap3	Slitrk4
Ajap1	2610034M16Rik	Ncald	Elmo1	Dkk2	Slit2
Ak5	Gja1	Pdzrn4	Emid1	Dmkn	Slc7a14
Akr1c18	1700027L20Rik	Irx1	Ermn	Dmrtb1	Slc6a3
Aldh1a1	Crb2	Ripply2	Esm1	Doc2b	Slc44a5
Aldh1a3	Sypl2	Frmd7	Etv1	Dpp4	Slc39a4
Aldh1a7	1700084C01Rik	Pcolce	Eya1	Dppa1	Slc35d3
Aldh1l1	Vcam1	Pcdh20	Eya4	Dpyd	Slc32a1
Aldh3b1	Ttpa	Mc5r	Fam107a	Drd1	Slc1a2
Aldoc	Pm20d1	Tmem200b	Fam114a1	E330017L17Rik	Slc18a3
ALM	Adhfe1	Slc24a4	Fam129a	Ebf2	Slc18a2
Aloxe3	Rorb	Ascl1	Fam159b	Ebf3	Slc17a6
Amotl1	2900005J15Rik	Tbx18	Fam163a	Emx2	Slc16a3
Amy1	Daam2	Srpx2	Fam19a1	Emx2os	Slc16a14
Amz1	Tmem82	Lox	Fam212b	Endou	Slc10a4
Angpt1	Rgs20	Tspo2	Fam46a	Ephb1	Six3os1
Ankrd34b	Abcd2	Sorcs3	Fam83d	Erbb4	Six3
Ankrd35	Lrig1	Rprm	Fgf18	Erg	Shisa8
Ankrd45	Gm266	Itga8	Fibin	Etv4	Sh3bgr
Ankrd55	Slc7a11	Sntg1	Foxo1	F2rl2	Serpine2
Anks1	Cldn10	Adam12	Frmd7	Fam101b	Sema3e
Ano10	Fam20a	Mmp16	Fstl4	Fam159b	Sema3a
Ano3	Ranbp3l	Tmem132d	Gabrg1	Fam19a1	Selo
Ano4	Elovl2	Rasgrf1	Gabrq	Fam20a	Sec14l1
Anxa1	Palld	Hrasls	Gas2l3	Fbxl7	Sdf2l1
Anxa5	Slc2a10	Kcnip3	Glra3	Fezf2	Sdc2
Aox4	Igsf1	A630055G03Rik	Gpc3	Fgf17	Scrg1
Aqp5	Aass	6330406I15Rik	Gpr126	Fn1	Scn9a
Aqp6	Slc25a18	A230077H06Rik	Gpr149	Fndc5	Schip1
Arhgap24	Sfrp5	Susd5	Gpr50	Foxp2	Scgn
Arhgap25	F3	Igf2	Gprin3	Frzb	Sbsn
Arhgap36	Fabp7	Tmem196	Grin2a	Fst	Sap30
Arhgap6	B230209K01Rik	B3gnt7	Grm1	Fstl5	Sall3
Arhgef3	Fgfbp3	3110035E14Rik	Grm8	Gal	Sall1
Art3	Emp2	Cd70	Gsg1l	Galr1	Rrad
Arx	Pdk4	Cntn6	Gsx2	Gkn1	Rpp25
Asb2	Acsbg1	Lrrtm4	Gulp1	Glipr1	RP23-15K8.1
Asb4	Kcne1l	Tmem132c	Has2os	Glra3	Rnf220
Ascl2	Ncan	Slc4a1	Hhatl	Gpc6	Rnd3
Asic4	Igfbp2	Lmo1	Hmcn1	Gpr139	Rmst
Aspg	Cd44	Sox3	Hpse	Gpr39	Rit2
Asphd1	1500002O10Rik	Slitrk3	Hrh1	Gpr88	Rgs6
Atp1a3	Greb1	Ano3	Hs6st2	Grik1	Rgs10
Atp6ap1l	Gpc4	Xylt1	Hsd11b1	H60b	Rftn1
Avpi1	Hes5	Tmem100	Hsdl2	Hgf	Ret
Avpr1a	Slc1a2	Csmd3	Hspb3	Hpgd	Rerg
AW551984	Tlcd1	Cp	Htr1a	Hs3st2	Rbp4
AW555464	Thbs1	Dll1	Htr1d	Hsd11b1	Rbfox1
B4galnt4	Dzip1l	Dpp6	Htr1f	Hsd17b13	Rasl11b
Baiap3	AI507597	Gpt2	Htr2c	Hsd17b2	Rasgrp2
Barhl2	LOC433374	Ntn1	Id3	Htr1d	Rasgrp1
Barx2	Gfap	Snx22	Igfbp4	Htr2c	Rasgef1b
Batf3	Ezr	Cntn1	Igfbp5	Igfbp7	Rasd1
BC005764	Loxl1	Gabra3	Igfbp6	Igsf3	Rasa3
BC030500	Lipg	Lgr5	Igsf9	Inpp4b	Racgap1
BC089491	Tst	Accn4	Il1rapl2	IT	Pygm
Bcan	Ppap2b	Slc6a19	Il7	Itga7	Pvt1
Bche	Veph1	Dbc1	Islr	Kcnip1	Ptpru
Bcl11a	Slc13a5	Pstpip2	Itga4	Kcnj5	Ptprm
Bcl11b	Rfx4	Ddx43	Itga8	Kif14	Ptprg
Bcl6	Grin2c	Ugdh	Itih5	Kit	Psph
Bdnf	Slc13a3	Lypd6	Itm2a	Klk9	Prss12
Bglap2	Elf5	Lrfn2	Jam2	Krt77	Prr16
Bglap3	Fjx1	Vipr2	Kank4	Krt80	Prox1
Bhlhe22	Fras1	Pid1	Kcne4	L2/3	Prkcdbp
Blnk	Megf10	Grin3a	Kcng2	L4	Prkcd
Bmp2	Slc27a1	Ifit2	Kcnn3	L5	Prdx4
Bmp3	2810055G20Rik	Gsx2	Kit	L6	Ppp1r1c
Bmp5	Lrrc23	1700086L19Rik	Kl	L6b	Ppp1r17
Bmp7	Pla2g7	Lrrtm1	Krt12	Layn	Ppp1r14c
Bnc2	Mfge8	Sdc3	Krt18	Lce3c	Ppapdc1a
Brinp3	Gabrb1	C430049B03Rik	Krt73	Lefty2	Pnoc
Bsn	Ccno	Clec3b	Lama3	Lgr5	Pmm2
Btbd3	Pax6	Sgcz	Lamp5	Lhfpl2	Plxna1
C030013G03Rik	Rdh5	A430107O13Rik	Lect1	Lhx1	Pld5
C030023E24Rik	Dynlrb2	Gucy2f	Lhx6	Lhx1os	Pitx3
C130021I20Rik	Cyp4f14	Ankfn1	Lmo1	Lhx2	Pip5kl1
C1ql1	Hsd11b1	Me3	LOC101056001	Lhx5	Pgr15l
C1ql2	Adora2b	Galnt13	LOC101056159	LOC102633724	Penk
C1ql3	Alpk3	Ryr3	LOC102633724	LOC102637409	Pdzrn4
C1qtnf7	Gm17455	Emb	LOC102634900	LOC105244376	Pde4b
C230034O21Rik	Folh1	S100a4	LOC105244517	LOC105245190	Pde2a
Cacna1a	Btbd17	Grik4	LOC105245003	LOC105245814	Pde1c
Cacna1b	Vit	Alas2	LOC105245834	LOC105245815	Pcp4l1
Cacna2d1	Alpl	Tmem132e	Lsp1	LOC105245834	Pcdhgc5
Cacna2d2	Ltbp1	Caskin2	Lypd6b	LOC105245960	Pcdh18
Cacna2d3	Lcat	LOC100616095	Mab21l1	LOC105246377	Pcdh17
Cacng2	Ngef	Ppp4r4	Man1a	LOC105246757	Pbxip1
Cacng5	Gpam	Rab27b	Mc5r	Lrg1	Pbx1
Cadps	Agt	9930013L23Rik	Me3	Lrrc9	Pax6
Cadps2	Mylk2	Gnat1	Megf10	Luzp2	Pax5
Calb1	AW011738	Calcrl	Meis2	Ly6d	Otx2
Calb2	Olfml1	Krt1	Mmd2	Ly6g6e	Osbpl5
Calcb	Raver2	4932411E22Rik	Mme	Lynx1	Oprk1
Calcr	Erbb2	Scn1a	Mob3b	Lypd1	Olfm3
Calcrl	3930402G23Rik	Lbh	Moxd1	Macc1	Nxph4
Caln1	Muc1	Gfra2	Mpped2	Maf	Nwd2
Camk2b	Arhgef26	Spon1	Mrap2	Man1a	Nubpl
Car1	3110082D06Rik	Tacc2	Mstn	Mapk13	Ntsr2
Car10	Dbx2	Vcan	Myh13	Marcksl1	Ntsr1
Car2	Nat1	1700019D03Rik	Myh4	Marcksl1-ps3	Ntng1
Car3	Hapln1	Fam89a	Myh8	Mc3r	Ntn1
Car4	4932438H23Rik	Kcnj16	Myl1	Mdga1	Ntf3
Casq2	Amot	Fam70a	NA	Met	Nrn1
Casr	Aox1	Sgcd	Ndnf	Mir135a-2	Nrg1
Casz1	Cyp1b1	Cspg5	Ndst4	Moxd1	Nr4a2
Cbln1	Ggnbp1	Vstm2b	Necab1	Mup3	Nr4a1
Cbln2	Prrx2	Cntnap5b	Necab2	Mup5	Nr3c1
Cbln4	Gjb6	Accn2	Nfkbiz	Myzap	Nr2f2
Cbr3	Tsku	Mybl1	Nkx2-1	NA	Nr2f1
Ccbe1	A930001A20Rik	Lpo	Nmbr	Naa11	Npy1r
Ccdc148	Mtmr11	B3gat2	Nptx2	Necab1	Npy
Ccdc28a	Plch1	Dnahc7b	Npy1r	Nefl	Nppa
Ccdc80	Ucp3	Cpz	Npy2r	Nnmt	Npnt
Cck	Ccnd2	Xkr5	Nr1h4	Nos1	Nova1
Cckbr	Acsf2	Isg20	Nr2f2	NP	Nos1ap
Ccl27b	Mapk4	Gypa	Nrp1	Npsr1	Nkain4
Ccnd1	Nphp3	St8sia1	Nrp2	Npw	Nhsl1
Ccser1	Acsl6	D330050G23Rik	Ntf3	Nr2f2	Nfib
Cd24a	Sfxn5	Marveld3	Ntn1	Nrn1l	Neurod6
Cd274	Ddo	Elfn1	Nts	Ntn5	Nek6
Cd40	Itga2	5730559C18Rik	Olfm3	Nxph1	Nefm
Cd52	Ptch1	Gstt1	Ostn	Nxph2	Necab1
Cd55	Dtna	Prr16	Ovol2	Nxph4	Ndst3
Cd59a	Ptpn13	Rbpjl	Oxtr	Olfr110	Ndnf
Cd72	Htra1	Slitrk4	P2rx2	Olfr111	Nars2
Cdca7	Spata3	Lpar3	P2ry1	Olfr550	Narf
Cdh10	C4b	LOC626082	Pard3b	Oprk1	Mt3
Cdh11	Frmpd1	Nell2	Pax6	Osr1	Mt2
Cdh13	Capsl	Chst11	Pbx3	P2ry12	Mt1
Cdh4	Lrrc9	Dbpht2	Pcdh11x	Pabpc4l	Mpped2
Cdh7	Slc13a1	Dscam	Pcdh8	Pappa2	Mlip
Cdh8	Egfl6	Kifc1	Pcsk5	Pcdh19	Mir99ahg
Cdh9	Rasa2	Epn2	Pcsk6	Pcp4l1	Mia
Cdhr1	Msx2	Pbk	Pde1a	Pde3a	Mgat4c
Cdk14	Gabrg1	Slc35f1	Pde3a	Pde7b	Meis2
Cdk15	Atp1a2	Shisa7	Pdgfra	Pdlim1	Meis1
Cdkl2	Rbpms2	Lamc3	Pdlim5	Pdyn	Meig1
Cdr1	3110079O15Rik	Mcf2	Penk	Penk	Mcc
Cela1	Lrrc38	Pdgfrl	Piezo2	Pim1	Mc3r
Celf3	Tril	AI118078	Pik3cg	Pld5	Mbnl3
Celf4	4930579J09Rik	Nmnat2	Pkp2	Plekha4	March4
Celf5	C030037D09Rik	Odf3l2	Pla2g4a	Pou3f1	March11
Celf6	D030047H15Rik	Col15a1	Plch2	Pou3f2	March1
Celsr3	Six5	Spsb4	Plekha2	Ppp1r36	Map3k1
Cenpa	Car5b	Creg2	Plekhd1	Prss23	Mamld1
Cfap126	9430041J12Rik	Prss50	Pltp	Psd4	Magel2
Cfap61	Id4	Dpp10	Plxdc1	PT	Mad2l1bp
Chat	Scara3	Fam19a1	Plxdc2	Ptchd4	Mab21l1
Chd5	Atp1b2	Tmem121	Pnoc	Ptger2	Lsg1
Chd7	A830093I24Rik	Slc16a12	Ppapdc1a	Ptgfr	Lrrtm3
Chgb	1700007K13Rik	Ckap2l	Ppfibp2	Ptprb	Lrrtm1
Chil1	1700003M07Rik	Kcnd2	Prdm1	Ptprt	Lrrn1
Chn2	Bhlhe40	Slc41a2	Prdm8	Ptpru	Lrrc4c
Chodl	Acot11	Dcaf12l2	Prkg2	Ptrf	Lppr5
Chrm2	Igdcc4	Cdc25c	Prss35	Rasgrp2	Lpl
Chrm3	Mtap7d3	4833422C13Rik	Pter	Rasgrp3	Lpar1
Chrm5	Ppil6	Ppp1r14c	Ptgdr	Rftn1	Lmx1a
Chrna2	Klf15	Accn1	Ptger3	Rgs5	Lmo4
Chrna3	Tpbg	Il17d	Ptgs2	Rhbdl3	Lmo3
Chrna4	Ptprz1	Qpct	Pth2r	Rmst	Lmo2
Chrna5	Syne1	Mmp17	Pthlh	Rprm	Lmo1
Chrna6	G530011O06Rik	Mkx	Ptprk	Rrad	Lhx9
Chrnb2	Fgfr1	Nptx2	Ptprt	Rspo1	Lhfpl2
Chrnb3	Vegfa	Scel	Ptpru	Rspo2	Lhfp
Chst8	Fxyd1	Nt5e	Pvalb	Rxfp1	Lgr5
Cidea	Dmp1	Slc4a10	Pygm	Rxfp2	Lgi1
Ckmt1	Bdnf	Lrrc4c	Qrfpr	S100a10	Lgals3bp
Cldn1	Lonrf3	Tmem90b	Ramp3	S100a3	Ldoc1
Clec18a	Gm216	Pmel	Rassf10	Samd9l	Ldb2
Clic5	Trps1	Nkain3	Reln	Sema3c	Klhl5
Clrn1	Lrrk2	Lrrn3	Rprm	Sema3e	Klhl1
Clstn2	Upp1	Wnt4	Rspo1	Serinc2	Klf12
Clvs1	Alpk1	Ankrd43	Rspo2	Serpinb11	Kitl
Clybl	Wwc1	Kif18b	Rspo4	Serpinb8	Kctd8
Cnih3	Adrbk2	A730017C20Rik	Rxfp1	Serpine2	Kctd16
Cnksr2	Ntrk3	Neu4	S100a10	Sh3bp4	Kcns3
Cnpy1	Nhsl1	Aldh1l2	Scgn	Shisa3	Kcnn3
Cnr1	D930015M05Rik	Olig1	Scrg1	Shisa6	Kcnmb2
Cntn3	Il17rd	Kcnmb4	Sema3c	Sla	Kcnma1
Cntn5	Spry2	Ano2	Sema3e	Slc17a6	Kcnk9
Cntnap2	Slc1a4	Zcchc16	Sema5a	Slc17a8	Kcnk2
Cntnap3	4930417G10Rik	Rxrg	Serpinf1	Slc35f4	Kcnk16
Cntnap4	Trh	Syt16	Sfrp1	Slco2a1	Kcnip4
Cntnap5a	Mcc	Scn3a	Sfrp2	Slfn2	Kcnip3
Cntnap5c	Gpc6	Nudt17	Sgcz	Spon1	Kcnc2
Cobll1	Lgr4	Fam19a2	Shisa8	Sstr1	Kcnab1
Col14a1	Capn11	2200002K05Rik	Sit1	Sstr2	Kank3
Col15a1	Kcnn2	Podn	Slc10a4	St3gal1	Jam2
Col18a1	Plagl1	Masp1	Slc17a8	St6galnac5	Islr2
Col23a1	Cyr61	Itgav	Slc18a3	Stac	Isl1
Col24a1	Tcfap2c	Ampd3	Slc24a4	Steap2	Irs4
Col25a1	Rsph1	Traf4	Slc35d3	Stxbp6	Iqsec3
Col27a1	Echdc3	Rsad2	Slc5a7	Susd5	Il1rap
Col6a1	Gabra4	Racgap1	Slc9a2	Syndig1	Il13ra1
Col6a2	Sorl1	Pcolce2	Sln	Syt17	Igsf1
Col8a1	Plscr1	Sulf2	Sncg	Syt6	Igfbpl1
Colgalt2	5033404E19Rik	Fignl1	Sorcs3	Tcerg1l	Igfbp5
Coro6	1600014C23Rik	Cdca3	Sox5	Tdo2	Igfbp3
Cort	Proca1	Nuf2	Sox8	Tgfb1	Ifitm2
Cox6b2	Ddit4l	Nrg2	Sp9	Tgm3	Ifitm10
Cpa6	Pcsk9	Pcsk2	Sparc	Thsd7a	Ifi30
Cpeb1	Eepd1	Ccnb1	Srpx2	Tmem163	Id4
Cplx3	Tnfaip8	Mdk	Sst	Tmem215	Htr7
Cpne2	Lrtm2	Cetn4	Sstr1	Tmem91	Htr4
Cpne4	Sparcl1	Gpc5	St6galnac5	Tmie	Hs3st5
Cpne5	4932443I19Rik	Klhl13	Stat4	Tnc	Hs3st2
Cpne7	Lgi4	Sdr42e1	Syndig1	Tox2	Homer2
Cpne8	Enkur	Tpx2	Syt2	Tph2	Hibch
CR	Cml5	Six4	Syt7	Trabd2b	Hgf
Crabp1	Tgfb2	Pcdhb10	Tac1	Trh	Hcrtr1
Crabp2	Hhipl1	Gm813	Tac2	Trhr	H2-DMa
Crh	Il33	Rcn1	Tacr3	Trpc5	Gucy2c
Crhbp	Tulp3	Prss41	Tacstd2	Tshz2	Gsx1
Crhr1	Dclk1	Itih5	Tcerg1l	Unc5d	Gsn
Crhr2	Tmprss7	Lypd1	Tgfbi	Upb1	Grm8
Crispld2	Col4a5	Rrm2	Th	VISp	Grin3a
Crmp1	Kctd14	Sox6	Thbs2	Wfdc17	Grik2
Crnde	Papss2	Serpina3n	Tiam2	Whrn	Gria1
Cryaa	Snora28	Zdhhc23	Tmem114	Wipf3	Gprc5b
Crygs	Hs3st3b1	Pcdhb2	Tmem182	Wls	Gpr83
Cryl1	Dnaic1	Vat1l	Tmem196	Wnt10a	Gpr149
Csgalnact1	Rgs7	Tac1	Tmem45a	Wscd1	Gpr101
CT	Pou3f2	Chga	Tpbg	Zar1l	Gpld1
Ctbp2	Gldc	Gm2a	Tpm2	Zbtb20	Gpc4
Ctnna1	P4ha2	Snora31	Trhde	Zcchc12	Gpc3
Ctsz	Chst1	Adora1	Trpc4	Zeb2	Gng13
Cttnbp2	Hyal1	Mcm6	Twist2	Zfp804b	Gm9747
Ctxn2	Olfml2a	Aldh1a1	Vegfc	Zfp811	Gm5532
Ctxn3	Dlk1	Oprl1	Vip	NA	Gm38112
Cux2	Boc	Inhbb	Vipr2	NA	Gm3764
Cygb	Rasl11a	Spc24	Wipf3	NA	Gm29374
Cyp4x1	Sycp2	Rad54l	Wnt7b	NA	Gm28498
D030045P18Rik	Sox1	Pcdhb9	Zcchc12	NA	Gm2694
D10Bwg1379e	Ncrna00085	6430704M03Rik	Zfp536	NA	Gm17750
D130043K22Rik	4933409K07Rik	Ptpru	Zmat4	NA	Gm14204
D16Ertd472e	Cd38	Zdhhc2	NA	NA	Gm13889
D3Bwg0562e	Echdc2	Kcnk10	NA	NA	Gm13205
Daam2	Ntsr2	9430021M05Rik	NA	NA	Gm11837
Dab1	Ddr2	Serping1	NA	NA	Gm11549
Dact1	Sfrp1	Cys1	NA	NA	Gm10421
Dcdc2a	3830431G21Rik	1700025G04Rik	NA	NA	Glra2
Dcn	Pde9a	Klc3	NA	NA	Gipr
Dcx	Glb1l	S100a1	NA	NA	Ghrh
Ddc	Scg3	Lin7a	NA	NA	Ghr
Ddit4l	Gm17660	Emilin3	NA	NA	Gfra1
Defb1	Wnt7a	Fanca	NA	NA	Gcsam
Depdc7	Cmya5	Ect2	NA	NA	Gch1
Dgkg	Axl	Adcy3	NA	NA	Gatm
Dhrs3	Mmp14	9330179D12Rik	NA	NA	Gas1
Diap3	Tnfrsf19	2700023E23Rik	NA	NA	Garnl3
Disp2	Dgkb	Fancd2	NA	NA	Galntl6
Dkk2	Acss1	Iqcj-schip1	NA	NA	Galnt13
Dkk3	Aspg	Mcm5	NA	NA	Gal
Dkkl1	Tekt5	Col12a1	NA	NA	Gad2
Dlk1	Als2cl	Adam9	NA	NA	Gad1
Dlx1	Notch2	Tmem35	NA	NA	Gabrq
Dlx1as	P2rx6	Neto1	NA	NA	Gabre
Dlx2	Znrf3	Pif1	NA	NA	Gabrd
Dlx5	Id3	Nlgn1	NA	NA	Gabra5
Dlx6	Hey2	Aebp1	NA	NA	Gabra1
Dlx6os1	Sned1	Sema3d	NA	NA	Fzd9
Dmkn	Ccdc121	Htr5a	NA	NA	Fstl4
Dmrt3	Gm11128	Extl1	NA	NA	Frmd7
Dmrtb1	Snora2b	I830012O16Rik	NA	NA	Foxp2
Dnm1	Baalc	Spin2	NA	NA	Foxa2
Doc2b	Ephb3	Fam135b	NA	NA	Foxa1
Dock5	Dhtkd1	Olig2	NA	NA	Flrt3
Dock9	Lix1	Efcab1	NA	NA	Fign
Dph1	Ddhd1	Wdhd1	NA	NA	Fibcd1
Dpp4	Rgma	Angptl1	NA	NA	Fhdc1
Dppa1	S1pr1	Ptchd2	NA	NA	Fhad1
Dpyd	Wdr52	Rbp4	NA	NA	Fgfr2
Dpysl5	Odz3	Unc80	NA	NA	Fgf20
Drd1	Sp6	Uhrf1	NA	NA	Fgf16
Drd2	Fam198a	Stk33	NA	NA	Fgf14
Dubr	Grm5	Kif2c	NA	NA	Fez2
Dusp14	Gm11992	Fam26e	NA	NA	Fbxl17
Dusp5	Thbs4	Gfra1	NA	NA	Fam84a
Dync1i1	Wdr69	Pcbd1	NA	NA	Fam65b
E030019B13Rik	2810030E01Rik	Shh	NA	NA	Fam19a4
E130003G02Rik	Adamts6	Efemp1	NA	NA	Fam19a2
E130309D14Rik	C2cd4b	Fbxo17	NA	NA	Fam19a1
E330013P04Rik	Hectd2	2810442I21Rik	NA	NA	Fam184a
E330017L17Rik	Pdyn	E130306D19Rik	NA	NA	Fam167a
E530001K10Rik	Ston2	Abcb4	NA	NA	Fam159a
Ebf1	Evc	Mybpc1	NA	NA	Fam101a
Ebf2	Tom1l1	Cenpm	NA	NA	F2r
Ebf3	Sp5	Siah3	NA	NA	Eya3
Ecel1	Nr4a2	Galnt10	NA	NA	Eya2
Edn1	Ndrg2	Gpr75	NA	NA	Etv1
Edn3	Timp3	Cdca8	NA	NA	Esrrg
Eepd1	Aldoc	Dfna5	NA	NA	Esr1
Efemp1	A430105I19Rik	Neto2	NA	NA	Ephb1
Efna3	Nr2e1	Mmp23	NA	NA	Epha7
Efna5	Fgf1	Col4a6	NA	NA	Epha6
eGFP	Gm2061	Eda2r	NA	NA	Epha5
Eif4ebp1	Hif3a	Aard	NA	NA	Epha4
Elavl2	Rarres1	Slc7a3	NA	NA	Epdr1
Elmo1	Ptar1	6530411M01Rik	NA	NA	Enox2
Elmod1	Mfap3l	Kntc1	NA	NA	En1
Emid1	Gulp1	Col6a1	NA	NA	Eif4ebp1
Emx2	Ccdc67	Exo1	NA	NA	eGFP
Emx2os	Prss35	Raet1d	NA	NA	Eepd1
En1	Pdpn	1190002F15Rik	NA	NA	Ecel1
Endou	Ppara	Prc1	NA	NA	Ebf2
Enox2	Slc2a4	Nlgn3	NA	NA	Ebf1
Eomes	Gas1	Cdh24	NA	NA	E530001K10Rik
Epb4.9	Malat1	Ntn4	NA	NA	Dusp5
Epdr1	Clu	Unc5c	NA	NA	Dusp14
Epha3	Rasgrp1	Igsf21	NA	NA	Dubr
Epha4	Rhcg	Lace1	NA	NA	Drd2
Epha5	Gpr156	Msc	NA	NA	Dph1
Epha6	Sfrs18	Grik1	NA	NA	Dock9
Epha7	Adcyap1r1	Fam114a1	NA	NA	Dmrtb1
Epha8	Per3	Aspm	NA	NA	Dlx6os1
Ephb1	Pln	Ptpn5	NA	NA	Dlx6
Erbb4	Plxnb1	Zfp648	NA	NA	Dlx5
Erc2	Car8	4922501L14Rik	NA	NA	Dlx2
Erg	Glycam1	Snora17	NA	NA	Dlx1
Ermn	Bai3	Slitrk5	NA	NA	Dlk1
Esm1	Epb4.1l5	Fign	NA	NA	Dkkl1
Esr1	Pbxip1	Slc6a3	NA	NA	Dkk3
Esrrg	Bdkrb2	Sostdc1	NA	NA	Dhrs3
Etv1	Gpr179	G0s2	NA	NA	Ddc
Etv4	Gm9766	Dnahc5	NA	NA	Dcdc2a
Eya1	Fos	Ube2c	NA	NA	D16Ertd472e
Eya2	Irs2	Zcchc24	NA	NA	Cygb
Eya3	Drp2	Cmtm4	NA	NA	Cttnbp2
Eya4	Pard3b	E030003E18Rik	NA	NA	Ctnna1
F2r	Tmem229a	Tceal6	NA	NA	Ctbp2
F2rl2	Pax4	Itgb8	NA	NA	Cryl1
Fam101a	Evc2	Gabrb2	NA	NA	Crnde
Fam101b	Rnf215	C1qtnf2	NA	NA	Crhr1
Fam107a	Gm10560	Zdhhc15	NA	NA	Crhbp
Fam114a1	Pdgfrb	Melk	NA	NA	Crabp1
Fam123c	Ndp	Krt17	NA	NA	Cpne8
Fam129a	Cml3	Serpine2	NA	NA	Cpne7
Fam131c	Exd1	Sox5	NA	NA	Cpeb1
Fam150b	Smyd1	Cpxm1	NA	NA	Cox6b2
Fam159a	Npas2	Necab2	NA	NA	Col25a1
Fam159b	Prodh	Prkg1	NA	NA	Cnr1
Fam163a	Cyp7b1	AF529169	NA	NA	Cnpy1
Fam163b	Npas3	Mis18bp1	NA	NA	Cnih3
Fam167a	Mtl5	1810010H24Rik	NA	NA	Clybl
Fam183b	Fam55d	Chrm1	NA	NA	Clec18a
Fam184a	Myh6	Slitrk6	NA	NA	Cldn1
Fam196a	Fgd4	Tshz3	NA	NA	Ckmt1
Fam19a1	Npff	Dlgap5	NA	NA	Cidea
Fam19a2	Efna4	2410127L17Rik	NA	NA	Chst8
Fam19a4	Lxn	Gjb2	NA	NA	Chrnb3
Fam20a	Appl2	Nrxn2	NA	NA	Chrna6
Fam212b	Ak4	Bves	NA	NA	Chrna4
Fam46a	Calr4	Troap	NA	NA	Chrna3
Fam65b	Camk2g	Enpp1	NA	NA	Chrm5
Fam83d	D130040H23Rik	Hmmr	NA	NA	Chrm2
Fam84a	Adra2a	Flrt1	NA	NA	Chil1
Fat3	Slc9a3r1	Mir1983	NA	NA	Chd7
Fbxl17	Klf4	Tmie	NA	NA	Cfap61
Fbxl7	Fgfr2	Rasl12	NA	NA	Cfap126
Fez2	Gm12238	Pter	NA	NA	Cdk14
Fezf2	Etv4	Ttc30a2	NA	NA	Cdh8
Fgf14	Fam59b	Kl	NA	NA	Cdh4
Fgf16	Rasl11b	Maneal	NA	NA	Cdh11
Fgf17	Abcb9	Gria4	NA	NA	Cd59a
Fgf18	Cideb	Ptprn	NA	NA	Cd55
Fgf20	Dmd	Fam149a	NA	NA	Cd24a
Fgf9	Pou3f4	Tmem132b	NA	NA	Ccser1
Fgfr2	2810459M11Rik	Myb	NA	NA	Cckbr
Fhad1	Tex9	Ptk7	NA	NA	Cck
Fhdc1	Glud1	Fbn1	NA	NA	Ccdc28a
Fibcd1	Gm10565	Zfp462	NA	NA	Cbln4
Fibin	Mgst1	Kcnd3	NA	NA	Cbln2
Fign	Macf1	Dscc1	NA	NA	Casr
Flrt3	Nr4a3	Plk1	NA	NA	Car4
Fmn1	5930412G12Rik	Ltk	NA	NA	Car2
Fn1	Sncaip	Kctd4	NA	NA	Car10
Fndc5	AU021034	Rimbp3	NA	NA	Caln1
Foxa1	Tmem200c	Epdr1	NA	NA	Calcr
Foxa2	Ak7	Ppp3r2	NA	NA	Calb2
Foxo1	Nrarp	Ednrb	NA	NA	Calb1
Foxo6	Fam84a	Epb4.1	NA	NA	Cadps2
Foxp2	Ccdc3	Kif14	NA	NA	Cacna2d1
Frmd7	Vav3	Ccna2	NA	NA	C230034O21Rik
Frmpd3	Nek8	Ankrd6	NA	NA	C130021I20Rik
Frzb	2009-09-01	Spire2	NA	NA	Btbd3
Fst	Cnn1	6030405A18Rik	NA	NA	Bnc2
Fstl4	Nmb	Cenpv	NA	NA	Bmp7
Fstl5	Gpt	Adam5	NA	NA	Bdnf
Fzd9	Fgd6	Dhrs13	NA	NA	Bcl6
Gabra1	Cecr2	Cdc7	NA	NA	BC030500
Gabra5	Cspp1	Pcdha11	NA	NA	Avpi1
Gabrd	Fads2	BC030867	NA	NA	Asic4
Gabre	Nckap5	Gabrb3	NA	NA	Asb4
Gabrg1	Sh3pxd2b	Ckap2	NA	NA	Arhgef3
Gabrg2	Slc6a1	Svep1	NA	NA	Arhgap36
Gabrq	Fam69c	Chpt1	NA	NA	Arhgap24
Gad1	C130071C03Rik	Tceal3	NA	NA	Anxa5
Gad2	Stk38l	Kif26b	NA	NA	Anxa1
Gal	Gabbr2	Kcnh5	NA	NA	Ano4
Galnt13	Pcdhgc5	Efs	NA	NA	Ano10
Galntl6	A930017M01Rik	Ak5	NA	NA	Anks1
Galr1	Fgf2	Arsj	NA	NA	Ankrd34b
Gap43	Itga6	Aqp3	NA	NA	Angpt1
Garnl3	Adamts5	Prrx1	NA	NA	Amz1
Gas1	LOC329427	Acpl2	NA	NA	Amotl1
Gas2l3	Sox2	Foxm1	NA	NA	Aldoc
Gatm	Kcnc4	Rep15	NA	NA	Aldh1a7
Gcgr	Rassf10	Pou3f1	NA	NA	Aldh1a1
Gch1	Gm889	1600021P15Rik	NA	NA	Akr1c18
Gcsam	Zfp280c	Usp24	NA	NA	Ak5
Gda	Leng8	Psrc1	NA	NA	AI593442
Gdf5	AA387883	Sez6	NA	NA	Adra1b
Gfra1	Pld2	Igfbp3	NA	NA	Adcyap1
Ghr	Dnali1	Sh3d19	NA	NA	Adcy8
Ghrh	Arhgef33	Kctd15	NA	NA	Adck5
Gipr	Ptn	Gucy1b2	NA	NA	Adarb2
Gjd2	1700019G17Rik	Ttk	NA	NA	Adap1
Gkn1	NA	NA	NA	NA	Adamtsl2
Glipr1	NA	NA	NA	NA	Adam11
Glra2	NA	NA	NA	NA	Actl6a
Glra3	NA	NA	NA	NA	Acbd4
Gm10035	NA	NA	NA	NA	A830082K12Rik
Gm10421	NA	NA	NA	NA	9330158H04Rik
Gm11549	NA	NA	NA	NA	2900055J20Rik
Gm11837	NA	NA	NA	NA	2810468N07Rik
Gm13205	NA	NA	NA	NA	2810025M15Rik
Gm13889	NA	NA	NA	NA	2010204K13Rik
Gm14204	NA	NA	NA	NA	1700040L02Rik
Gm16532	NA	NA	NA	NA	1110015O18Rik
Gm17750	NA	NA	NA	NA	NA
Gm2694	NA	NA	NA	NA	NA
Gm28498	NA	NA	NA	NA	NA
Gm29374	NA	NA	NA	NA	NA
Gm3764	NA	NA	NA	NA	NA
Gm38112	NA	NA	NA	NA	NA
Gm514	NA	NA	NA	NA	NA
Gm5424	NA	NA	NA	NA	NA
Gm5532	NA	NA	NA	NA	NA
Gm5741	NA	NA	NA	NA	NA
Gm9747	NA	NA	NA	NA	NA
Gng13	NA	NA	NA	NA	NA
Gng2	NA	NA	NA	NA	NA
Gnrh1	NA	NA	NA	NA	NA
Gpc3	NA	NA	NA	NA	NA
Gpc4	NA	NA	NA	NA	NA
Gpc6	NA	NA	NA	NA	NA
Gpld1	NA	NA	NA	NA	NA
Gpr101	NA	NA	NA	NA	NA
Gpr12	NA	NA	NA	NA	NA
Gpr126	NA	NA	NA	NA	NA
Gpr135	NA	NA	NA	NA	NA
Gpr139	NA	NA	NA	NA	NA
Gpr149	NA	NA	NA	NA	NA
Gpr151	NA	NA	NA	NA	NA
Gpr21	NA	NA	NA	NA	NA
Gpr22	NA	NA	NA	NA	NA
Gpr26	NA	NA	NA	NA	NA
Gpr39	NA	NA	NA	NA	NA
Gpr50	NA	NA	NA	NA	NA
Gpr64	NA	NA	NA	NA	NA
Gpr83	NA	NA	NA	NA	NA
Gpr88	NA	NA	NA	NA	NA
Gprc5b	NA	NA	NA	NA	NA
Gprin1	NA	NA	NA	NA	NA
Gprin3	NA	NA	NA	NA	NA
Grem2	NA	NA	NA	NA	NA
Gria1	NA	NA	NA	NA	NA
Grid2ip	NA	NA	NA	NA	NA
Grik1	NA	NA	NA	NA	NA
Grik2	NA	NA	NA	NA	NA
Grin1	NA	NA	NA	NA	NA
Grin2a	NA	NA	NA	NA	NA
Grin2d	NA	NA	NA	NA	NA
Grin3a	NA	NA	NA	NA	NA
Grip2	NA	NA	NA	NA	NA
Grm1	NA	NA	NA	NA	NA
Grm2	NA	NA	NA	NA	NA
Grm8	NA	NA	NA	NA	NA
Gsg1l	NA	NA	NA	NA	NA
Gsn	NA	NA	NA	NA	NA
Gsx1	NA	NA	NA	NA	NA
Gsx2	NA	NA	NA	NA	NA
Gucy2c	NA	NA	NA	NA	NA
Gulp1	NA	NA	NA	NA	NA
H2-DMa	NA	NA	NA	NA	NA
H2-M5	NA	NA	NA	NA	NA
H60b	NA	NA	NA	NA	NA
Has2os	NA	NA	NA	NA	NA
Has3	NA	NA	NA	NA	NA
Hcn1	NA	NA	NA	NA	NA
Hcn3	NA	NA	NA	NA	NA
Hcn4	NA	NA	NA	NA	NA
Hcrtr1	NA	NA	NA	NA	NA
Hecw1	NA	NA	NA	NA	NA
Hgf	NA	NA	NA	NA	NA
Hhatl	NA	NA	NA	NA	NA
Hibch	NA	NA	NA	NA	NA
Hmcn1	NA	NA	NA	NA	NA
Homer2	NA	NA	NA	NA	NA
Hpgd	NA	NA	NA	NA	NA
Hpse	NA	NA	NA	NA	NA
Hrh1	NA	NA	NA	NA	NA
Hs3st2	NA	NA	NA	NA	NA
Hs3st5	NA	NA	NA	NA	NA
Hs6st2	NA	NA	NA	NA	NA
Hs6st3	NA	NA	NA	NA	NA
Hsd11b1	NA	NA	NA	NA	NA
Hsd17b13	NA	NA	NA	NA	NA
Hsd17b2	NA	NA	NA	NA	NA
Hsdl2	NA	NA	NA	NA	NA
Hspa12a	NA	NA	NA	NA	NA
Hspb3	NA	NA	NA	NA	NA
Htr1a	NA	NA	NA	NA	NA
Htr1d	NA	NA	NA	NA	NA
Htr1f	NA	NA	NA	NA	NA
Htr2c	NA	NA	NA	NA	NA
Htr3a	NA	NA	NA	NA	NA
Htr4	NA	NA	NA	NA	NA
Htr7	NA	NA	NA	NA	NA
Id3	NA	NA	NA	NA	NA
Id4	NA	NA	NA	NA	NA
Ifi30	NA	NA	NA	NA	NA
Ifitm10	NA	NA	NA	NA	NA
Ifitm2	NA	NA	NA	NA	NA
Igf1	NA	NA	NA	NA	NA
Igfbp3	NA	NA	NA	NA	NA
Igfbp4	NA	NA	NA	NA	NA
Igfbp5	NA	NA	NA	NA	NA
Igfbp6	NA	NA	NA	NA	NA
Igfbp7	NA	NA	NA	NA	NA
Igfbpl1	NA	NA	NA	NA	NA
Igsf1	NA	NA	NA	NA	NA
Igsf3	NA	NA	NA	NA	NA
Igsf9	NA	NA	NA	NA	NA
Il13ra1	NA	NA	NA	NA	NA
Il1rap	NA	NA	NA	NA	NA
Il1rapl2	NA	NA	NA	NA	NA
Il7	NA	NA	NA	NA	NA
Ina	NA	NA	NA	NA	NA
Inpp4b	NA	NA	NA	NA	NA
Insm2	NA	NA	NA	NA	NA
Ipw	NA	NA	NA	NA	NA
Iqsec3	NA	NA	NA	NA	NA
Irs4	NA	NA	NA	NA	NA
Isl1	NA	NA	NA	NA	NA
Islr	NA	NA	NA	NA	NA
Islr2	NA	NA	NA	NA	NA
IT	NA	NA	NA	NA	NA
Itga4	NA	NA	NA	NA	NA
Itga7	NA	NA	NA	NA	NA
Itga8	NA	NA	NA	NA	NA
Itgbl1	NA	NA	NA	NA	NA
Itih5	NA	NA	NA	NA	NA
Itm2a	NA	NA	NA	NA	NA
Jam2	NA	NA	NA	NA	NA
Jph4	NA	NA	NA	NA	NA
Kank3	NA	NA	NA	NA	NA
Kank4	NA	NA	NA	NA	NA
Kcna4	NA	NA	NA	NA	NA
Kcnab1	NA	NA	NA	NA	NA
Kcnb2	NA	NA	NA	NA	NA
Kcnc2	NA	NA	NA	NA	NA
Kcne4	NA	NA	NA	NA	NA
Kcng2	NA	NA	NA	NA	NA
Kcnh1	NA	NA	NA	NA	NA
Kcnh7	NA	NA	NA	NA	NA
Kcnip1	NA	NA	NA	NA	NA
Kcnip2	NA	NA	NA	NA	NA
Kcnip3	NA	NA	NA	NA	NA
Kcnip4	NA	NA	NA	NA	NA
Kcnj5	NA	NA	NA	NA	NA
Kcnk16	NA	NA	NA	NA	NA
Kcnk2	NA	NA	NA	NA	NA
Kcnk9	NA	NA	NA	NA	NA
Kcnma1	NA	NA	NA	NA	NA
Kcnmb2	NA	NA	NA	NA	NA
Kcnn3	NA	NA	NA	NA	NA
Kcnq2	NA	NA	NA	NA	NA
Kcnq5	NA	NA	NA	NA	NA
Kcns2	NA	NA	NA	NA	NA
Kcns3	NA	NA	NA	NA	NA
Kcnt1	NA	NA	NA	NA	NA
Kctd16	NA	NA	NA	NA	NA
Kctd8	NA	NA	NA	NA	NA
Kif14	NA	NA	NA	NA	NA
Kit	NA	NA	NA	NA	NA
Kitl	NA	NA	NA	NA	NA
Kl	NA	NA	NA	NA	NA
Klf12	NA	NA	NA	NA	NA
Klhdc8a	NA	NA	NA	NA	NA
Klhl1	NA	NA	NA	NA	NA
Klhl29	NA	NA	NA	NA	NA
Klhl5	NA	NA	NA	NA	NA
Klk9	NA	NA	NA	NA	NA
Krt12	NA	NA	NA	NA	NA
Krt18	NA	NA	NA	NA	NA
Krt73	NA	NA	NA	NA	NA
Krt77	NA	NA	NA	NA	NA
Krt80	NA	NA	NA	NA	NA
L1cam	NA	NA	NA	NA	NA
L2/3	NA	NA	NA	NA	NA
L3mbtl1	NA	NA	NA	NA	NA
L4	NA	NA	NA	NA	NA
L5	NA	NA	NA	NA	NA
L6	NA	NA	NA	NA	NA
L6b	NA	NA	NA	NA	NA
Lama3	NA	NA	NA	NA	NA
Lamp5	NA	NA	NA	NA	NA
Layn	NA	NA	NA	NA	NA
Lce3c	NA	NA	NA	NA	NA
Ldb2	NA	NA	NA	NA	NA
Ldoc1	NA	NA	NA	NA	NA
Lect1	NA	NA	NA	NA	NA
Lefty2	NA	NA	NA	NA	NA
Lgals3bp	NA	NA	NA	NA	NA
Lgi1	NA	NA	NA	NA	NA
Lgr5	NA	NA	NA	NA	NA
Lhfp	NA	NA	NA	NA	NA
Lhfpl2	NA	NA	NA	NA	NA
Lhfpl5	NA	NA	NA	NA	NA
Lhx1	NA	NA	NA	NA	NA
Lhx1os	NA	NA	NA	NA	NA
Lhx2	NA	NA	NA	NA	NA
Lhx5	NA	NA	NA	NA	NA
Lhx6	NA	NA	NA	NA	NA
Lhx8	NA	NA	NA	NA	NA
Lhx9	NA	NA	NA	NA	NA
Lin28b	NA	NA	NA	NA	NA
Lmo1	NA	NA	NA	NA	NA
Lmo2	NA	NA	NA	NA	NA
Lmo3	NA	NA	NA	NA	NA
Lmo4	NA	NA	NA	NA	NA
Lmx1a	NA	NA	NA	NA	NA
LOC101056001	NA	NA	NA	NA	NA
LOC101056159	NA	NA	NA	NA	NA
LOC102633724	NA	NA	NA	NA	NA
LOC102634900	NA	NA	NA	NA	NA
LOC102637409	NA	NA	NA	NA	NA
LOC105244376	NA	NA	NA	NA	NA
LOC105244517	NA	NA	NA	NA	NA
LOC105245003	NA	NA	NA	NA	NA
LOC105245190	NA	NA	NA	NA	NA
LOC105245814	NA	NA	NA	NA	NA
LOC105245815	NA	NA	NA	NA	NA
LOC105245834	NA	NA	NA	NA	NA
LOC105245960	NA	NA	NA	NA	NA
LOC105246377	NA	NA	NA	NA	NA
LOC105246757	NA	NA	NA	NA	NA
Lonrf2	NA	NA	NA	NA	NA
Lpar1	NA	NA	NA	NA	NA
Lpl	NA	NA	NA	NA	NA
Lppr5	NA	NA	NA	NA	NA
Lrfn5	NA	NA	NA	NA	NA
Lrg1	NA	NA	NA	NA	NA
Lrrc26	NA	NA	NA	NA	NA
Lrrc3b	NA	NA	NA	NA	NA
Lrrc4c	NA	NA	NA	NA	NA
Lrrc9	NA	NA	NA	NA	NA
Lrrn1	NA	NA	NA	NA	NA
Lrrtm1	NA	NA	NA	NA	NA
Lrrtm3	NA	NA	NA	NA	NA
Lsg1	NA	NA	NA	NA	NA
Lsp1	NA	NA	NA	NA	NA
Luzp2	NA	NA	NA	NA	NA
Ly6d	NA	NA	NA	NA	NA
Ly6g6e	NA	NA	NA	NA	NA
Ly6h	NA	NA	NA	NA	NA
Lynx1	NA	NA	NA	NA	NA
Lypd1	NA	NA	NA	NA	NA
Lypd6b	NA	NA	NA	NA	NA
Mab21l1	NA	NA	NA	NA	NA
Macc1	NA	NA	NA	NA	NA
Mad2l1bp	NA	NA	NA	NA	NA
Maf	NA	NA	NA	NA	NA
Magel2	NA	NA	NA	NA	NA
Mal2	NA	NA	NA	NA	NA
Mamld1	NA	NA	NA	NA	NA
Man1a	NA	NA	NA	NA	NA
Map3k1	NA	NA	NA	NA	NA
Map3k15	NA	NA	NA	NA	NA
Mapk13	NA	NA	NA	NA	NA
March1	NA	NA	NA	NA	NA
March11	NA	NA	NA	NA	NA
March4	NA	NA	NA	NA	NA
Marcksl1	NA	NA	NA	NA	NA
Marcksl1-ps3	NA	NA	NA	NA	NA
Mast1	NA	NA	NA	NA	NA
Mbnl3	NA	NA	NA	NA	NA
Mc3r	NA	NA	NA	NA	NA
Mc5r	NA	NA	NA	NA	NA
Mcc	NA	NA	NA	NA	NA
Mdga1	NA	NA	NA	NA	NA
Me3	NA	NA	NA	NA	NA
Meg3	NA	NA	NA	NA	NA
Megf10	NA	NA	NA	NA	NA
Meig1	NA	NA	NA	NA	NA
Meis1	NA	NA	NA	NA	NA
Meis2	NA	NA	NA	NA	NA
Met	NA	NA	NA	NA	NA
Mgat4c	NA	NA	NA	NA	NA
Mia	NA	NA	NA	NA	NA
Mia1	NA	NA	NA	NA	NA
Mical2	NA	NA	NA	NA	NA
Mir135a-2	NA	NA	NA	NA	NA
Mir99ahg	NA	NA	NA	NA	NA
Mirg	NA	NA	NA	NA	NA
Mlip	NA	NA	NA	NA	NA
Mllt11	NA	NA	NA	NA	NA
Mmd2	NA	NA	NA	NA	NA
Mme	NA	NA	NA	NA	NA
Mmp24	NA	NA	NA	NA	NA
Mob3b	NA	NA	NA	NA	NA
Moxd1	NA	NA	NA	NA	NA
Mpped2	NA	NA	NA	NA	NA
Mrap2	NA	NA	NA	NA	NA
Mstn	NA	NA	NA	NA	NA
Mt1	NA	NA	NA	NA	NA
Mt2	NA	NA	NA	NA	NA
Mt3	NA	NA	NA	NA	NA
Mtus2	NA	NA	NA	NA	NA
Mup3	NA	NA	NA	NA	NA
Mup5	NA	NA	NA	NA	NA
Myh13	NA	NA	NA	NA	NA
Myh4	NA	NA	NA	NA	NA
Myh8	NA	NA	NA	NA	NA
Myl1	NA	NA	NA	NA	NA
Myt1l	NA	NA	NA	NA	NA
Myzap	NA	NA	NA	NA	NA
N28178	NA	NA	NA	NA	NA
NA	NA	NA	NA	NA	NA
Naa11	NA	NA	NA	NA	NA
Nanos1	NA	NA	NA	NA	NA
Nanos2	NA	NA	NA	NA	NA
Nap1l2	NA	NA	NA	NA	NA
Napb	NA	NA	NA	NA	NA
Narf	NA	NA	NA	NA	NA
Nars2	NA	NA	NA	NA	NA
Ndnf	NA	NA	NA	NA	NA
Ndrg4	NA	NA	NA	NA	NA
Ndst3	NA	NA	NA	NA	NA
Ndst4	NA	NA	NA	NA	NA
Necab1	NA	NA	NA	NA	NA
Necab2	NA	NA	NA	NA	NA
Nefl	NA	NA	NA	NA	NA
Nefm	NA	NA	NA	NA	NA
Nek6	NA	NA	NA	NA	NA
Nell1	NA	NA	NA	NA	NA
Neurod1	NA	NA	NA	NA	NA
Neurod2	NA	NA	NA	NA	NA
Neurod6	NA	NA	NA	NA	NA
Nfib	NA	NA	NA	NA	NA
Nfkbiz	NA	NA	NA	NA	NA
Ngfr	NA	NA	NA	NA	NA
Nhlh1	NA	NA	NA	NA	NA
Nhlh2	NA	NA	NA	NA	NA
Nhsl1	NA	NA	NA	NA	NA
Nkain4	NA	NA	NA	NA	NA
Nkx2-1	NA	NA	NA	NA	NA
Nmbr	NA	NA	NA	NA	NA
Nnmt	NA	NA	NA	NA	NA
Nos1	NA	NA	NA	NA	NA
Nos1ap	NA	NA	NA	NA	NA
Nov	NA	NA	NA	NA	NA
Nova1	NA	NA	NA	NA	NA
NP	NA	NA	NA	NA	NA
Npas4	NA	NA	NA	NA	NA
Npnt	NA	NA	NA	NA	NA
Nppa	NA	NA	NA	NA	NA
Nppc	NA	NA	NA	NA	NA
Npsr1	NA	NA	NA	NA	NA
Nptx2	NA	NA	NA	NA	NA
Nptxr	NA	NA	NA	NA	NA
Npw	NA	NA	NA	NA	NA
Npy	NA	NA	NA	NA	NA
Npy1r	NA	NA	NA	NA	NA
Npy2r	NA	NA	NA	NA	NA
Nr1h4	NA	NA	NA	NA	NA
Nr2f1	NA	NA	NA	NA	NA
Nr2f2	NA	NA	NA	NA	NA
Nr3c1	NA	NA	NA	NA	NA
Nr4a1	NA	NA	NA	NA	NA
Nr4a2	NA	NA	NA	NA	NA
Nrg1	NA	NA	NA	NA	NA
Nrg3	NA	NA	NA	NA	NA
Nrip3	NA	NA	NA	NA	NA
Nrn1	NA	NA	NA	NA	NA
Nrn1l	NA	NA	NA	NA	NA
Nrp1	NA	NA	NA	NA	NA
Nrp2	NA	NA	NA	NA	NA
Nrxn3	NA	NA	NA	NA	NA
Nsg2	NA	NA	NA	NA	NA
Ntf3	NA	NA	NA	NA	NA
Ntn1	NA	NA	NA	NA	NA
Ntn5	NA	NA	NA	NA	NA
Ntng1	NA	NA	NA	NA	NA
Ntrk1	NA	NA	NA	NA	NA
Nts	NA	NA	NA	NA	NA
Ntsr1	NA	NA	NA	NA	NA
Ntsr2	NA	NA	NA	NA	NA
Nubpl	NA	NA	NA	NA	NA
Nwd2	NA	NA	NA	NA	NA
Nxnl2	NA	NA	NA	NA	NA
Nxph1	NA	NA	NA	NA	NA
Nxph2	NA	NA	NA	NA	NA
Nxph3	NA	NA	NA	NA	NA
Nxph4	NA	NA	NA	NA	NA
Odz2	NA	NA	NA	NA	NA
Odz4	NA	NA	NA	NA	NA
Olfm3	NA	NA	NA	NA	NA
Olfr110	NA	NA	NA	NA	NA
Olfr111	NA	NA	NA	NA	NA
Olfr550	NA	NA	NA	NA	NA
Oprk1	NA	NA	NA	NA	NA
Osbpl5	NA	NA	NA	NA	NA
Osr1	NA	NA	NA	NA	NA
Ostn	NA	NA	NA	NA	NA
Otx2	NA	NA	NA	NA	NA
Ovol2	NA	NA	NA	NA	NA
Oxtr	NA	NA	NA	NA	NA
P2rx2	NA	NA	NA	NA	NA
P2rx5	NA	NA	NA	NA	NA
P2ry1	NA	NA	NA	NA	NA
P2ry12	NA	NA	NA	NA	NA
Pabpc4l	NA	NA	NA	NA	NA
Palm3	NA	NA	NA	NA	NA
Pappa2	NA	NA	NA	NA	NA
Pard3b	NA	NA	NA	NA	NA
Pax5	NA	NA	NA	NA	NA
Pax6	NA	NA	NA	NA	NA
Pbx1	NA	NA	NA	NA	NA
Pbx3	NA	NA	NA	NA	NA
Pbxip1	NA	NA	NA	NA	NA
Pcdh11x	NA	NA	NA	NA	NA
Pcdh17	NA	NA	NA	NA	NA
Pcdh18	NA	NA	NA	NA	NA
Pcdh19	NA	NA	NA	NA	NA
Pcdh8	NA	NA	NA	NA	NA
Pcdha2	NA	NA	NA	NA	NA
Pcdha3	NA	NA	NA	NA	NA
Pcdha5	NA	NA	NA	NA	NA
Pcdha6	NA	NA	NA	NA	NA
Pcdhgc5	NA	NA	NA	NA	NA
Pcp4	NA	NA	NA	NA	NA
Pcp4l1	NA	NA	NA	NA	NA
Pcsk1	NA	NA	NA	NA	NA
Pcsk5	NA	NA	NA	NA	NA
Pcsk6	NA	NA	NA	NA	NA
Pdcd1lg2	NA	NA	NA	NA	NA
Pde1a	NA	NA	NA	NA	NA
Pde1c	NA	NA	NA	NA	NA
Pde2a	NA	NA	NA	NA	NA
Pde3a	NA	NA	NA	NA	NA
Pde4b	NA	NA	NA	NA	NA
Pde7b	NA	NA	NA	NA	NA
Pdgfra	NA	NA	NA	NA	NA
Pdlim1	NA	NA	NA	NA	NA
Pdlim5	NA	NA	NA	NA	NA
Pdyn	NA	NA	NA	NA	NA
Pdzrn4	NA	NA	NA	NA	NA
Peg3	NA	NA	NA	NA	NA
Peli3	NA	NA	NA	NA	NA
Penk	NA	NA	NA	NA	NA
Pgm2l1	NA	NA	NA	NA	NA
Pgr15l	NA	NA	NA	NA	NA
Piezo2	NA	NA	NA	NA	NA
Pik3c2g	NA	NA	NA	NA	NA
Pik3cg	NA	NA	NA	NA	NA
Pim1	NA	NA	NA	NA	NA
Pip5kl1	NA	NA	NA	NA	NA
Pitx3	NA	NA	NA	NA	NA
Pkib	NA	NA	NA	NA	NA
Pkp2	NA	NA	NA	NA	NA
Pla2g4a	NA	NA	NA	NA	NA
Pla2g4e	NA	NA	NA	NA	NA
Plch2	NA	NA	NA	NA	NA
Pld5	NA	NA	NA	NA	NA
Plek2	NA	NA	NA	NA	NA
Plekha2	NA	NA	NA	NA	NA
Plekha4	NA	NA	NA	NA	NA
Plekha7	NA	NA	NA	NA	NA
Plekhd1	NA	NA	NA	NA	NA
Pltp	NA	NA	NA	NA	NA
Plxdc1	NA	NA	NA	NA	NA
Plxdc2	NA	NA	NA	NA	NA
Plxna1	NA	NA	NA	NA	NA
Pmm2	NA	NA	NA	NA	NA
Pnma2	NA	NA	NA	NA	NA
Pnoc	NA	NA	NA	NA	NA
Pou3f1	NA	NA	NA	NA	NA
Pou3f2	NA	NA	NA	NA	NA
Pou6f2	NA	NA	NA	NA	NA
Ppapdc1a	NA	NA	NA	NA	NA
Ppfia4	NA	NA	NA	NA	NA
Ppfibp2	NA	NA	NA	NA	NA
Ppp1r14c	NA	NA	NA	NA	NA
Ppp1r17	NA	NA	NA	NA	NA
Ppp1r1c	NA	NA	NA	NA	NA
Ppp1r36	NA	NA	NA	NA	NA
Prdm1	NA	NA	NA	NA	NA
Prdm8	NA	NA	NA	NA	NA
Prdx4	NA	NA	NA	NA	NA
Prkar1b	NA	NA	NA	NA	NA
Prkcd	NA	NA	NA	NA	NA
Prkcdbp	NA	NA	NA	NA	NA
Prkg2	NA	NA	NA	NA	NA
Prlhr	NA	NA	NA	NA	NA
Prmt8	NA	NA	NA	NA	NA
Prokr2	NA	NA	NA	NA	NA
Prox1	NA	NA	NA	NA	NA
Prr16	NA	NA	NA	NA	NA
Prrt2	NA	NA	NA	NA	NA
Prss12	NA	NA	NA	NA	NA
Prss23	NA	NA	NA	NA	NA
Prss35	NA	NA	NA	NA	NA
Prtn3	NA	NA	NA	NA	NA
Psd4	NA	NA	NA	NA	NA
Psph	NA	NA	NA	NA	NA
PT	NA	NA	NA	NA	NA
Ptchd4	NA	NA	NA	NA	NA
Pter	NA	NA	NA	NA	NA
Ptgdr	NA	NA	NA	NA	NA
Ptger2	NA	NA	NA	NA	NA
Ptger3	NA	NA	NA	NA	NA
Ptgfr	NA	NA	NA	NA	NA
Ptgs2	NA	NA	NA	NA	NA
Pth2r	NA	NA	NA	NA	NA
Pthlh	NA	NA	NA	NA	NA
Ptprb	NA	NA	NA	NA	NA
Ptprg	NA	NA	NA	NA	NA
Ptprk	NA	NA	NA	NA	NA
Ptprm	NA	NA	NA	NA	NA
Ptprt	NA	NA	NA	NA	NA
Ptpru	NA	NA	NA	NA	NA
Ptrf	NA	NA	NA	NA	NA
Pvalb	NA	NA	NA	NA	NA
Pvt1	NA	NA	NA	NA	NA
Pygm	NA	NA	NA	NA	NA
Qrfpr	NA	NA	NA	NA	NA
Rab3b	NA	NA	NA	NA	NA
Rab3c	NA	NA	NA	NA	NA
Rab6b	NA	NA	NA	NA	NA
Racgap1	NA	NA	NA	NA	NA
Radil	NA	NA	NA	NA	NA
Rai2	NA	NA	NA	NA	NA
Ramp3	NA	NA	NA	NA	NA
Rasa3	NA	NA	NA	NA	NA
Rasd1	NA	NA	NA	NA	NA
Rasgef1b	NA	NA	NA	NA	NA
Rasgrp1	NA	NA	NA	NA	NA
Rasgrp2	NA	NA	NA	NA	NA
Rasgrp3	NA	NA	NA	NA	NA
Rasl11b	NA	NA	NA	NA	NA
Rassf10	NA	NA	NA	NA	NA
Rassf6	NA	NA	NA	NA	NA
Rbfox1	NA	NA	NA	NA	NA
Rbfox3	NA	NA	NA	NA	NA
Rbms3	NA	NA	NA	NA	NA
Rbp4	NA	NA	NA	NA	NA
Reln	NA	NA	NA	NA	NA
Rem2	NA	NA	NA	NA	NA
Rerg	NA	NA	NA	NA	NA
Ret	NA	NA	NA	NA	NA
Rftn1	NA	NA	NA	NA	NA
Rgag1	NA	NA	NA	NA	NA
Rgmb	NA	NA	NA	NA	NA
Rgs10	NA	NA	NA	NA	NA
Rgs11	NA	NA	NA	NA	NA
Rgs5	NA	NA	NA	NA	NA
Rgs6	NA	NA	NA	NA	NA
Rgs8	NA	NA	NA	NA	NA
Rhbdl3	NA	NA	NA	NA	NA
Rhov	NA	NA	NA	NA	NA
Rian	NA	NA	NA	NA	NA
Rims3	NA	NA	NA	NA	NA
Ripk4	NA	NA	NA	NA	NA
Rit2	NA	NA	NA	NA	NA
Rmst	NA	NA	NA	NA	NA
Rnd3	NA	NA	NA	NA	NA
Rnf152	NA	NA	NA	NA	NA
Rnf220	NA	NA	NA	NA	NA
Robo2	NA	NA	NA	NA	NA
RP23-15K8.1	NA	NA	NA	NA	NA
Rpp25	NA	NA	NA	NA	NA
Rprm	NA	NA	NA	NA	NA
Rrad	NA	NA	NA	NA	NA
Rspo1	NA	NA	NA	NA	NA
Rspo2	NA	NA	NA	NA	NA
Rspo3	NA	NA	NA	NA	NA
Rspo4	NA	NA	NA	NA	NA
Rtbdn	NA	NA	NA	NA	NA
Runx1t1	NA	NA	NA	NA	NA
Rxfp1	NA	NA	NA	NA	NA
Rxfp2	NA	NA	NA	NA	NA
S100a10	NA	NA	NA	NA	NA
S100a3	NA	NA	NA	NA	NA
Sall1	NA	NA	NA	NA	NA
Sall3	NA	NA	NA	NA	NA
Samd3	NA	NA	NA	NA	NA
Samd9l	NA	NA	NA	NA	NA
Sap30	NA	NA	NA	NA	NA
Satb2	NA	NA	NA	NA	NA
Sbsn	NA	NA	NA	NA	NA
Scg2	NA	NA	NA	NA	NA
Scgn	NA	NA	NA	NA	NA
Schip1	NA	NA	NA	NA	NA
Scn3b	NA	NA	NA	NA	NA
Scn9a	NA	NA	NA	NA	NA
Scrg1	NA	NA	NA	NA	NA
Scrt1	NA	NA	NA	NA	NA
Scrt2	NA	NA	NA	NA	NA
Scube3	NA	NA	NA	NA	NA
Sdc2	NA	NA	NA	NA	NA
Sdf2l1	NA	NA	NA	NA	NA
Sdk2	NA	NA	NA	NA	NA
Sec14l1	NA	NA	NA	NA	NA
Selo	NA	NA	NA	NA	NA
Sema3a	NA	NA	NA	NA	NA
Sema3c	NA	NA	NA	NA	NA
Sema3e	NA	NA	NA	NA	NA
Sema5a	NA	NA	NA	NA	NA
Sema6c	NA	NA	NA	NA	NA
Serinc2	NA	NA	NA	NA	NA
Serpinb11	NA	NA	NA	NA	NA
Serpinb8	NA	NA	NA	NA	NA
Serpine2	NA	NA	NA	NA	NA
Serpinf1	NA	NA	NA	NA	NA
Serpini1	NA	NA	NA	NA	NA
Sertad4	NA	NA	NA	NA	NA
Sfrp1	NA	NA	NA	NA	NA
Sfrp2	NA	NA	NA	NA	NA
Sgcz	NA	NA	NA	NA	NA
Sgsm1	NA	NA	NA	NA	NA
Sh3bgr	NA	NA	NA	NA	NA
Sh3bp4	NA	NA	NA	NA	NA
Shank1	NA	NA	NA	NA	NA
Shisa3	NA	NA	NA	NA	NA
Shisa6	NA	NA	NA	NA	NA
Shisa8	NA	NA	NA	NA	NA
Sit1	NA	NA	NA	NA	NA
Six3	NA	NA	NA	NA	NA
Six3os1	NA	NA	NA	NA	NA
Sla	NA	NA	NA	NA	NA
Slc10a4	NA	NA	NA	NA	NA
Slc12a5	NA	NA	NA	NA	NA
Slc16a14	NA	NA	NA	NA	NA
Slc16a3	NA	NA	NA	NA	NA
Slc17a6	NA	NA	NA	NA	NA
Slc17a8	NA	NA	NA	NA	NA
Slc18a2	NA	NA	NA	NA	NA
Slc18a3	NA	NA	NA	NA	NA
Slc1a2	NA	NA	NA	NA	NA
Slc24a4	NA	NA	NA	NA	NA
Slc2a13	NA	NA	NA	NA	NA
Slc32a1	NA	NA	NA	NA	NA
Slc35d3	NA	NA	NA	NA	NA
Slc35f4	NA	NA	NA	NA	NA
Slc38a4	NA	NA	NA	NA	NA
Slc39a4	NA	NA	NA	NA	NA
Slc44a5	NA	NA	NA	NA	NA
Slc5a7	NA	NA	NA	NA	NA
Slc6a15	NA	NA	NA	NA	NA
Slc6a17	NA	NA	NA	NA	NA
Slc6a3	NA	NA	NA	NA	NA
Slc6a7	NA	NA	NA	NA	NA
Slc7a14	NA	NA	NA	NA	NA
Slc9a2	NA	NA	NA	NA	NA
Slco2a1	NA	NA	NA	NA	NA
Slfn2	NA	NA	NA	NA	NA
Slit2	NA	NA	NA	NA	NA
Slitrk4	NA	NA	NA	NA	NA
Sln	NA	NA	NA	NA	NA
Snap25	NA	NA	NA	NA	NA
Snca	NA	NA	NA	NA	NA
Sncb	NA	NA	NA	NA	NA
Sncg	NA	NA	NA	NA	NA
Snhg11	NA	NA	NA	NA	NA
Snhg4	NA	NA	NA	NA	NA
Sorcs2	NA	NA	NA	NA	NA
Sorcs3	NA	NA	NA	NA	NA
Sox5	NA	NA	NA	NA	NA
Sox6	NA	NA	NA	NA	NA
Sox8	NA	NA	NA	NA	NA
Sp8	NA	NA	NA	NA	NA
Sp9	NA	NA	NA	NA	NA
Sparc	NA	NA	NA	NA	NA
Sparcl1	NA	NA	NA	NA	NA
Sphkap	NA	NA	NA	NA	NA
Spint2	NA	NA	NA	NA	NA
Spock1	NA	NA	NA	NA	NA
Spon1	NA	NA	NA	NA	NA
Spr	NA	NA	NA	NA	NA
Spsb2	NA	NA	NA	NA	NA
Spx	NA	NA	NA	NA	NA
Srpx2	NA	NA	NA	NA	NA
Srrm4	NA	NA	NA	NA	NA
Sst	NA	NA	NA	NA	NA
Sstr1	NA	NA	NA	NA	NA
Sstr2	NA	NA	NA	NA	NA
St3gal1	NA	NA	NA	NA	NA
St6galnac4	NA	NA	NA	NA	NA
St6galnac5	NA	NA	NA	NA	NA
St8sia2	NA	NA	NA	NA	NA
St8sia5	NA	NA	NA	NA	NA
Stac	NA	NA	NA	NA	NA
Stac2	NA	NA	NA	NA	NA
Stat4	NA	NA	NA	NA	NA
Steap2	NA	NA	NA	NA	NA
Stk19	NA	NA	NA	NA	NA
Stk32b	NA	NA	NA	NA	NA
Stmn2	NA	NA	NA	NA	NA
Stmn3	NA	NA	NA	NA	NA
Stxbp1	NA	NA	NA	NA	NA
Stxbp6	NA	NA	NA	NA	NA
Sulf2	NA	NA	NA	NA	NA
Surf6	NA	NA	NA	NA	NA
Susd5	NA	NA	NA	NA	NA
Sv2b	NA	NA	NA	NA	NA
Sv2c	NA	NA	NA	NA	NA
Svep1	NA	NA	NA	NA	NA
Syn2	NA	NA	NA	NA	NA
Syndig1	NA	NA	NA	NA	NA
Syndig1l	NA	NA	NA	NA	NA
Syngr3	NA	NA	NA	NA	NA
Synpr	NA	NA	NA	NA	NA
Syp	NA	NA	NA	NA	NA
Syt1	NA	NA	NA	NA	NA
Syt10	NA	NA	NA	NA	NA
Syt13	NA	NA	NA	NA	NA
Syt17	NA	NA	NA	NA	NA
Syt2	NA	NA	NA	NA	NA
Syt3	NA	NA	NA	NA	NA
Syt4	NA	NA	NA	NA	NA
Syt5	NA	NA	NA	NA	NA
Syt6	NA	NA	NA	NA	NA
Syt7	NA	NA	NA	NA	NA
Tac1	NA	NA	NA	NA	NA
Tac2	NA	NA	NA	NA	NA
Tacr1	NA	NA	NA	NA	NA
Tacr3	NA	NA	NA	NA	NA
Tacstd2	NA	NA	NA	NA	NA
Tbr1	NA	NA	NA	NA	NA
Tcerg1l	NA	NA	NA	NA	NA
Tcf12	NA	NA	NA	NA	NA
Tcf4	NA	NA	NA	NA	NA
Tchh	NA	NA	NA	NA	NA
Tcp11	NA	NA	NA	NA	NA
Tdo2	NA	NA	NA	NA	NA
Tekt2	NA	NA	NA	NA	NA
Tenm2	NA	NA	NA	NA	NA
Tenm3	NA	NA	NA	NA	NA
Tgfb1	NA	NA	NA	NA	NA
Tgfb2	NA	NA	NA	NA	NA
Tgfbi	NA	NA	NA	NA	NA
Tgm3	NA	NA	NA	NA	NA
Th	NA	NA	NA	NA	NA
Thbs2	NA	NA	NA	NA	NA
Thsd7a	NA	NA	NA	NA	NA
Thsd7b	NA	NA	NA	NA	NA
Tiam2	NA	NA	NA	NA	NA
Tle1	NA	NA	NA	NA	NA
Tle3	NA	NA	NA	NA	NA
Tlk1	NA	NA	NA	NA	NA
Tm4sf5	NA	NA	NA	NA	NA
Tm6sf1	NA	NA	NA	NA	NA
Tmem114	NA	NA	NA	NA	NA
Tmem117	NA	NA	NA	NA	NA
Tmem130	NA	NA	NA	NA	NA
Tmem132b	NA	NA	NA	NA	NA
Tmem145	NA	NA	NA	NA	NA
Tmem159	NA	NA	NA	NA	NA
Tmem163	NA	NA	NA	NA	NA
Tmem169	NA	NA	NA	NA	NA
Tmem176a	NA	NA	NA	NA	NA
Tmem178	NA	NA	NA	NA	NA
Tmem182	NA	NA	NA	NA	NA
Tmem196	NA	NA	NA	NA	NA
Tmem2	NA	NA	NA	NA	NA
Tmem200a	NA	NA	NA	NA	NA
Tmem215	NA	NA	NA	NA	NA
Tmem45a	NA	NA	NA	NA	NA
Tmem59l	NA	NA	NA	NA	NA
Tmem63c	NA	NA	NA	NA	NA
Tmem90a	NA	NA	NA	NA	NA
Tmem91	NA	NA	NA	NA	NA
Tmie	NA	NA	NA	NA	NA
Tnc	NA	NA	NA	NA	NA
Tnfaip8l3	NA	NA	NA	NA	NA
Tox2	NA	NA	NA	NA	NA
Tpbg	NA	NA	NA	NA	NA
Tph2	NA	NA	NA	NA	NA
Tpm2	NA	NA	NA	NA	NA
Trabd2b	NA	NA	NA	NA	NA
Trank1	NA	NA	NA	NA	NA
Trfr2	NA	NA	NA	NA	NA
Trh	NA	NA	NA	NA	NA
Trhde	NA	NA	NA	NA	NA
Trhr	NA	NA	NA	NA	NA
Trim66	NA	NA	NA	NA	NA
Trp73	NA	NA	NA	NA	NA
Trpc4	NA	NA	NA	NA	NA
Trpc5	NA	NA	NA	NA	NA
Trpc6	NA	NA	NA	NA	NA
Trpv6	NA	NA	NA	NA	NA
Tshz2	NA	NA	NA	NA	NA
Tspan15	NA	NA	NA	NA	NA
Tspan18	NA	NA	NA	NA	NA
Tspan9	NA	NA	NA	NA	NA
Tubb3	NA	NA	NA	NA	NA
Tubb6	NA	NA	NA	NA	NA
Tuft1	NA	NA	NA	NA	NA
Twist2	NA	NA	NA	NA	NA
Tyw3	NA	NA	NA	NA	NA
Ubash3b	NA	NA	NA	NA	NA
Uchl1	NA	NA	NA	NA	NA
Ufsp1	NA	NA	NA	NA	NA
Unc13a	NA	NA	NA	NA	NA
Unc13b	NA	NA	NA	NA	NA
Unc5a	NA	NA	NA	NA	NA
Unc5c	NA	NA	NA	NA	NA
Unc5d	NA	NA	NA	NA	NA
Uncx	NA	NA	NA	NA	NA
Upb1	NA	NA	NA	NA	NA
Upp2	NA	NA	NA	NA	NA
Usp29	NA	NA	NA	NA	NA
Vamp1	NA	NA	NA	NA	NA
Vash2	NA	NA	NA	NA	NA
Vax1	NA	NA	NA	NA	NA
Vcan	NA	NA	NA	NA	NA
Vegfc	NA	NA	NA	NA	NA
Vgf	NA	NA	NA	NA	NA
Vip	NA	NA	NA	NA	NA
Vipr2	NA	NA	NA	NA	NA
VISp	NA	NA	NA	NA	NA
Vmn2r1	NA	NA	NA	NA	NA
Vsnl1	NA	NA	NA	NA	NA
Vstm2a	NA	NA	NA	NA	NA
Vstm2l	NA	NA	NA	NA	NA
Vwc2l	NA	NA	NA	NA	NA
Wdr54	NA	NA	NA	NA	NA
Wfdc17	NA	NA	NA	NA	NA
Wfs1	NA	NA	NA	NA	NA
Whrn	NA	NA	NA	NA	NA
Wipf3	NA	NA	NA	NA	NA
Wls	NA	NA	NA	NA	NA
Wnt10a	NA	NA	NA	NA	NA
Wnt5a	NA	NA	NA	NA	NA
Wnt7b	NA	NA	NA	NA	NA
Wscd1	NA	NA	NA	NA	NA
Wscd2	NA	NA	NA	NA	NA
Xkr7	NA	NA	NA	NA	NA
Ybx2	NA	NA	NA	NA	NA
Zar1	NA	NA	NA	NA	NA
Zar1l	NA	NA	NA	NA	NA
Zbtb20	NA	NA	NA	NA	NA
Zbtb7c	NA	NA	NA	NA	NA
Zcchc12	NA	NA	NA	NA	NA
Zdbf2	NA	NA	NA	NA	NA
Zdhhc2	NA	NA	NA	NA	NA
Zdhhc22	NA	NA	NA	NA	NA
Zeb2	NA	NA	NA	NA	NA
Zfp385b	NA	NA	NA	NA	NA
Zfp40	NA	NA	NA	NA	NA
Zfp536	NA	NA	NA	NA	NA
Zfp804a	NA	NA	NA	NA	NA
Zfp804b	NA	NA	NA	NA	NA
Zfp811	NA	NA	NA	NA	NA
Zic1	NA	NA	NA	NA	NA
Zic4	NA	NA	NA	NA	NA
Zmat4	NA	NA	NA	NA	NA

## Sheet: References
Ref:	Tasic B, Yao Z, Graybuck LT, Smith KA, Nguyen TN, Bertagnolli D, Goldy J, Garren E, Economo MN, Viswanathan S, et al (2018) Shared and distinct transcriptomic cell types across neocortical areas. Nature 563: 72–78
Suppl.material source:	Supplementary_Table_9_Cell_types_markers
Type of Information:	Gene markers associated to GABAergic, Glutamatergic neurons.
link:	https://www.nature.com/articles/s41586-018-0654-5#Sec34
Ref:	Hook PW, McClymont SA, Cannon GH, Law WD, Morton AJ, Goff LA & McCallion AS (2018) Single-Cell RNA-Seq of Mouse Dopaminergic Neurons Informs Candidate Gene Selection for Sporadic Parkinson Disease. The American Journal of Human Genetics 102: 427–446
Suppl.material source:	Table S2. A table with marker genes found for all 13 identified DA neuron populations
Type of Information:	Gene markers associated to dopaminergic (Th+) neurons corresponding to the authors ID: P7.OB.3
link:	https://www.sciencedirect.com/science/article/pii/S0002929718300466?via%3Dihub#app3
Ref:	Voskuhl RR, Itoh N, Tassoni A, Matsukawa MA, Ren E, Tse V, Jang E, Suen TT & Itoh Y (2019) Gene expression in oligodendrocytes during remyelination reveals cholesterol homeostasis as a therapeutic target in multiple sclerosis. PNAS 116: 10130–10139
Suppl.material source:	Supplementary dataset_S02 (pnas.1821306116.sd02)
Type of Information:	Gene markers associated to Astrocytes, Neurons and oligodendrocyte precursors (OPCs).
link:	https://www.pnas.org/doi/abs/10.1073/pnas.1821306116?url_ver=Z39.88-2003&rfr_id=ori%3Arid%3Acrossref.org&rfr_dat=cr_pub++0pubmed
